# Supplementary material
Source: PubMed Central journal article supplement (PMC5902423)
Supplement: NIHMS940357-supplement-supp_NotesS1.pdf [file NIHMS940357-supplement-supp_NotesS1.pdf]

## SUPPORTING INFORMATION

### Dense infraspecific sampling reveals rapid and independent trajectories of plastome degradation in a heterotrophic orchid complex

Craig F. Barrett, Susann Wicke, and Chodon Sass

Accepted: 23 January, 2018

**Notes S1.** **A.** Members of the *Corallorhiza striata* complex. From left to right: *C. striata* var. *striata* (Montana, USA); *C. striata* var. *vreelandii* (Arizona, USA); *C. striata* [Sierra Nevada, California, USA]; *C. bentleyi* (Virginia, USA); *C. involuta* (Morelos, México). **B.** List of accessions sequenced in this study. ‘Taxon’ follows Barrett & Freudenstein (2011). ‘St. Dev. coverage (×)’ = standard deviation of coverage depth as assessed in GENEIOUS; ‘% plastid reads’ = normalized percentage of plastid reads for each accession mapping to reference; ‘Incertae sedis’ indicates unknown taxonomic affinities of coastal CA and western Oregonian samples; \* = that accession was sequenced by genome skimming and sequence capture; <sup>1</sup> = accessions excluded due to low coverage. **C.** Source citations and GenBank accession numbers for the four-gene dataset used in divergence time estimation. **D.** Fossils used to calibrate divergence time estimates. **E.** Numbers of polymorphic sites and nucleotide diversity ( $\pi$ ) within each taxon of the *C. striata* complex, and average number of differences between each taxon. **F.** Divergence time estimates and 95% HPD for the four-gene orchid dataset, focusing on Calypsoinae and *Corallorhiza*, based on four genes and fossil calibrations described above in D. **G.** Minimum spanning haplotype network among plastomes of the *C. striata* complex, constructed in PopART. Numbering along network edges represents the numbers of mutations between haplotypes.

**Collections** used in this study are presented below in **A.**, and voucher specimens were published in two previous studies (Barrett and Freudenstein, 2009; 2011).

**Divergence time estimation.** We compiled a four-gene, 54-taxon dataset for the purpose of estimating divergence times among species of orchid subtribe Calypsoinae, genus *Corallorhiza*, and specifically the *C. striata* complex. We chose the nuclear Internal Transcribed Spacer (ITS), and the plastid genes *matK*, *rbcL*, and *psaB* based on their completeness in taxon sampling across the group, and based on the fact that each shows sufficient variation for phylogenetic analysis at both high (subfamily-level; Givnish et al., 2015) and low taxonomic levels (genus, species, and infraspecific levels; Freudenstein and Senyo, 2008; Barrett and Freudenstein, 2010; Freudenstein et al., 2017). Sequences were mined from orchid-wide plastome studies (*psaB*; Cameron, 2004; *matK*, *rbcL*, *psaB*; Givnish et al., 2015), and from a recently published study of subtribe Calypsoinae, to which *Corallorhiza* belongs (ITS, *matK*; Freudenstein et al., 2017). Remaining sequences were filled in from newly sequenced material for *Corallorhiza*, and the last remaining gaps were filled by searching in GenBank (mostly for ITS, *psaB*). In a few cases for the latter GenBank searches, if we were not able to find the same species for a particular locus, we used an alternative species of the same genus. No data were available for *psaB* in *Changnienia*, *Cremastra*, *Danxiaorchis*, *Oreorchis*, or *Yunorchis*. GenBank accessions are listed in **C.**

We used RAxML to produce a Maximum Likelihood tree based on a gene-partitioned GTR+GAMMA model, using ten replicate searches for the four-gene matrix. The resulting tree and dataset were used to determine divergence time estimates in BEAST v.2.4.7 (Bouckaert et al., 2014). Substitution models for each dataset were determined in MEGA v.7 (Kumar et al., 2016), under the corrected Akaike Information Criterion (AICc). The model with the lowest AICc score for each of the four datasets was GTR+I+G. We built the BEAST .xml command file in BEAUTI2 (part of the BEAST2 suite of tools). We chose to analyze the combined dataset under a GTR+I+G substitution model, with parameters estimated from the data. We estimated divergence times under the uncorrelated lognormal clock model, which treats each branch as having its own rate drawn from a distribution of discrete rates (Drummond et al., 2006).

Fossil calibrations were chosen based on two recent findings (C): *Dendrobium* from New Zealand (Conran et al., 2009), and a recently described member of subfamily Epidendroideae from Baltic amber (Poinar and Rasmussen, 2017). For each, fossils were used as minimum age estimates. We placed lognormal prior distributions on fossil calibration points, using the ‘offset’ function as a bound on the minimum age of each clade [20 my for the stem node of *Dendrobium* (mean = 22.7 mya, standard deviation = 2); Conran et al., 2009, based on the recommendation of Iles et al., 2015 in a review of monocot fossils; and 40 my as a minimum age for the stem node of Epidendroideae (mean = 48.05, standard deviation = 2) based on Poinar and Rasmussen et al. 2017). The means of the lognormal priors were set based on findings for those clades in Givnish et al. (2015),  $\pm$  two standard deviations, to cast a wide range for the prior on each calibration node. A Yule speciation model was chosen as in Givnish et al. (2015), in order to be consistent with that study. BEAST was run three times from random starting seeds, for  $2.0 \times 10^8$  generations of the Markov Chain Monte Carlo sampler, storing trees and parameters every  $10^4$  generations, and discarding the first 30% of trees/parameters as burn-in. Effective sample sizes of  $>200$  for parameters were checked in TRACER v.1.6 (<http://tree.bio.ed.ac.uk/software/tracer>) to verify stationarity of each run, and to assess convergence on the same parameter values across independent runs. Post burn-in data were combined in LogCombiner, trees were constructed in TreeAnnotator (both part of the BEAST2 suite of tools), and visualized in FigTree v.1.4.3 ([tree.bio.ed.ac.uk/software/figtree](http://tree.bio.ed.ac.uk/software/figtree)), displaying mean divergence estimates and 95% highest posterior densities to account for estimation error (F). In addition, branch widths were scaled by thickness based on rates, measured as substitutions $\cdot$ site $^{-1}\cdot$ year $^{-1}$  to assess shifts in substitution rate over time across the tree.

**Patterns of plastid genome diversity in the *C. striata* complex.** We assessed diversity among the five taxonomic entities of the *C. striata* complex by calculating GTR-corrected p-distances within and between species and varieties in MEGA v.7 (Kumar et al., 2016). We tested correlation of genetic vs. geographic distance (isolation by distance) by constructing pairwise genetic and geographic distance matrices, in MEGA and the Geographic Distance Matrix Generator ([http://biodiversityinformatics.amnh.org/open\\_source/gdmg](http://biodiversityinformatics.amnh.org/open_source/gdmg)), respectively. We assessed correlation between these matrices via a Mantel test in GenAlEx v.6.5 (Peakall and Smouse, 2012). A minimum spanning haplotype network was created in PopART (Bandelt et al., 1999; Leigh and Bryant, 2015).

Results are listed in F and G.

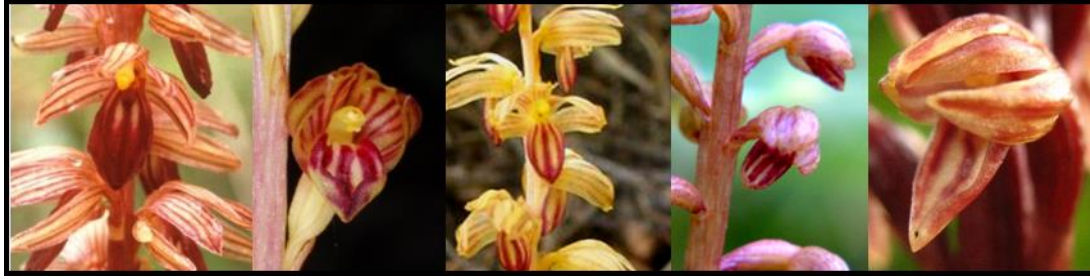

A. Members of the *Corallorhiza striata* complex. From left to right: *C. striata* var. *striata* (Montana, USA); *C. striata* var. *vreelandii* (Arizona, USA); *C. striata* [Sierra Nevada, California, USA]; *C. bentleyi* (Virginia, USA); *C. involuta* (Morelos, México).

B. List of accessions sequenced in this study. ‘Taxon’ follows Barrett & Freudenstein (2011). ‘St. Dev. coverage (×)’ = standard deviation of coverage depth as assessed in Geneious; ‘% plastid reads’ = normalized percentage of plastid reads for each accession mapping to reference; ‘Incertae sedis’ indicates unknown taxonomic affinities of coastal CA and western Oregonian samples; \* = that accession was sequenced by genome skimming and sequence capture; <sup>1</sup> = accessions excluded due to low coverage. Voucher specimens for populations of each accession are listed in Barrett and Freudenstein (2009; 2011).

| Taxon                                           | Accession    | Locality                       | Mean coverage depth (×) | St. Dev. coverage (×) | % plastid reads (or capture efficiency in sequence capture) | Length (bp) |
|-------------------------------------------------|--------------|--------------------------------|-------------------------|-----------------------|-------------------------------------------------------------|-------------|
| <b>Genome skimming</b>                          |              |                                |                         |                       |                                                             |             |
| <i>Calypso bulbosa</i> var. <i>americana</i>    | 349 OR       | Josephine Co., Oregon, USA     | 154.5                   | 52.2                  | 0.98                                                        | 149,313     |
| <i>Corallorhiza trifida</i>                     | JVF 2763a MI | Mackinac Co, Michigan, USA     | 253.2                   | 80.4                  | 2.78                                                        | 149,376     |
| <i>Corallorhiza bentleyi</i>                    | JVF 2550 WV  | Monroe Co., West Virginia, USA | 95                      | 36.8                  | 0.21                                                        | 124,482     |
| <i>Corallorhiza involuta</i>                    | 237c MEX     | Mexico, Mexico                 | 166.4                   | 39.2                  | 1.13                                                        | 124,433     |
| <i>Corallorhiza striata</i> var. <i>striata</i> | 120b UT      | Cache Co., Utah, USA           | 163.3                   | 81.5                  | 0.38                                                        | 141,915     |
| <i>Corallorhiza striata</i> Sierra Nevada       | 242b CA      | Placer Co., California, USA    | 202.7                   | 38.9                  | 1.33                                                        | 137,068     |
| <i>Corallorhiza incertae sedis</i>              | 350b OR      | Jackson Co., Oregon, USA       | 263                     | 45.4                  | 1.55                                                        | 141,202     |
| <b>Targeted sequence capture</b>                |              |                                |                         |                       |                                                             |             |
| <i>Corallorhiza striata</i> Sierra Nevada       | 5a CA        | Calaveras Co., California, USA | 1762                    | 892.3                 | 46.52                                                       |             |
| <i>Corallorhiza striata</i> Sierra Nevada       | 8 CA         | El Dorado Co., California, USA | 1041.2                  | 508.9                 | 57.23                                                       |             |
| <i>Corallorhiza striata</i> Sierra Nevada       | 9a CA        | Nevada Co., California, USA    | 2192.2                  | 1199.9                | 38.27                                                       |             |

|                                                    |          |                                                |        |        |       |
|----------------------------------------------------|----------|------------------------------------------------|--------|--------|-------|
| <i>Corallorhiza striata</i> Sierra Nevada          | 13a CA   | Tehama Co., California, USA                    | 424.8  | 216.4  | 31.79 |
| <i>Corallorhiza striata</i> Sierra Nevada          | 242b CA* | Placer Co., California, USA                    | 1487.1 | 736.9  | 42.54 |
| <i>Corallorhiza striata</i> Sierra Nevada          | 248 CA   | Madera Co., California, USA                    | 921    | 418.9  | 28.43 |
| <i>Corallorhiza striata</i> Sierra Nevada          | 253c CA  | Fresno Co., California, USA                    | 1148.3 | 602.8  | 36.76 |
| <i>Corallorhiza incertae sedis</i>                 | 312a CA  | Santa Cruz Co., California, USA                | 610.7  | 317.3  | 38.68 |
| <i>Corallorhiza incertae sedis</i>                 | 312c CA  | Santa Cruz Co., California, USA                | 736.5  | 395.6  | 42.18 |
| <i>Corallorhiza striata</i> var. <i>striata</i>    | 2b MI    | Schoolcraft Co., Michigan, USA                 | 816.9  | 427.9  | 42.04 |
| <i>Corallorhiza striata</i> var. <i>striata</i>    | 29a OR   | Lane Co., Oregon, USA                          | 1062.6 | 586.5  | 37.31 |
| <i>Corallorhiza striata</i> var. <i>striata</i>    | 39b WA   | Skamania Co., Washington, USA                  | 2853.6 | 1481.2 | 31.81 |
| <i>Corallorhiza striata</i> var. <i>striata</i>    | 48a WA   | Lewis Co., Washington, USA                     | 2637.1 | 1256.7 | 44.08 |
| <i>Corallorhiza striata</i> var. <i>striata</i>    | DJ68 OR  | Wallowa Co., Oregon, USA                       | 569.4  | 317.4  | 30.43 |
| <i>Corallorhiza striata</i> var. <i>striata</i>    | 120b UT* | Cache Co., Utah, USA                           | 862.5  | 459.2  | 45.31 |
| <i>Corallorhiza striata</i> var. <i>striata</i>    | 125e WY  | Lincoln Co., Wyoming, USA                      | 2954.7 | 1555.1 | 38.72 |
| <i>Corallorhiza striata</i> var. <i>striata</i>    | 135a WY  | Natrona Co., Wyoming, USA                      | 1935.9 | 1042.6 | 37.10 |
| <i>Corallorhiza striata</i> var. <i>striata</i>    | 200a MT  | Glacier Co., Montana, USA                      | 450.7  | 217.8  | 34.44 |
| <i>Corallorhiza striata</i> var. <i>striata</i>    | 206c AB  | Bow River, Alberta, Canada                     | 1902.8 | 1012.9 | 35.62 |
| <i>Corallorhiza striata</i> var. <i>striata</i>    | 219c BC  | Okanagan-Similkameen, British Columbia, Canada | 881.3  | 474.9  | 36.01 |
| <i>Corallorhiza striata</i> var. <i>striata</i>    | 223c BC  | Thompson-Nicola, British Columbia, Canada      | 1359.1 | 667.3  | 32.48 |
| <i>Corallorhiza striata</i> var. <i>striata</i>    | 350b OR* | Jackson Co., Oregon, USA                       | 852.8  | 460.2  | 40.08 |
| <i>Corallorhiza striata</i> var. <i>striata</i>    | HeshA MB | Winnipeg, Manitoba, Canada                     | 1780.7 | 841.7  | 42.44 |
| <i>Corallorhiza striata</i> var. <i>striata</i>    | JH1b MN  | Crow Wing Co., Minnesota, USA                  | 1777.6 | 840.4  | 53.31 |
| <i>Corallorhiza striata</i> var. <i>striata</i>    | JH2c WI  | Douglas Co., Wisconsin, USA                    | 1072.5 | 720.9  | 32.02 |
| <i>Corallorhiza striata</i> var. <i>vreelandii</i> | 100b NM  | Santa Fe Co., New Mexico, USA                  | 1742.3 | 825.9  | 61.16 |

|                                                    |                        |                                           |        |        |        |
|----------------------------------------------------|------------------------|-------------------------------------------|--------|--------|--------|
| <i>Corallorhiza striata</i> var. <i>vreelandii</i> | 103b NM                | Otero Co., New Mexico, USA                | 1346.7 | 218.2  | 49.77  |
| <i>Corallorhiza striata</i> var. <i>vreelandii</i> | 110b AZ                | Graham Co., Arizona, USA                  | 3961.5 | 1654.9 | 64.89  |
| <i>Corallorhiza striata</i> var. <i>vreelandii</i> | 112c AZ                | Pima Co., Arizona, USA                    | 2386.3 | 979.6  | 80.41  |
| <i>Corallorhiza striata</i> var. <i>vreelandii</i> | 113b AZ                | Gila Co., Arizona, USA                    | 1612.4 | 78.4   | 46.79  |
| <i>Corallorhiza striata</i> var. <i>vreelandii</i> | 114c UT                | Utah Co., Utah, USA                       | 7632.2 | 2993   | 48.56  |
| <i>Corallorhiza striata</i> var. <i>vreelandii</i> | 116c UT                | Tooele Co., Utah, USA                     | 1692.3 | 808.7  | 48.058 |
| <i>Corallorhiza striata</i> var. <i>vreelandii</i> | 158b CO                | Saguache Co., Colorado, USA               | 550    | 323.7  | 30.00  |
| <i>Corallorhiza striata</i> var. <i>vreelandii</i> | 163e CO                | Ouray Co., Colorado, USA                  | 839.9  | 421.3  | 55.82  |
| <i>Corallorhiza striata</i> var. <i>vreelandii</i> | 229a HID <sup>1</sup>  | El Chico, Hidalgo, Mexico                 | 35.5   | 19.4   | 42.51  |
| <i>Corallorhiza striata</i> var. <i>vreelandii</i> | 229b HID               | El Chico, Hidalgo, Mexico                 | 372    | 208.9  | 36.35  |
| <i>Corallorhiza striata</i> var. <i>vreelandii</i> | LR5 NL <sup>1</sup>    | Lomond River, Newfoundland, Canada        | 33.6   | 17.8   | 39.61  |
| <i>Corallorhiza striata</i> var. <i>vreelandii</i> | RB3b NL                | Corner Brook, Newfoundland, Canada        | 1807   | 954.3  | 45.46  |
| <i>Corallorhiza bentleyi</i>                       | 63a VA                 | Giles Co., Virginia, USA                  | 600.8  | 321.4  | 27.54  |
| <i>Corallorhiza bentleyi</i>                       | 66a VA                 | Giles Co., Virginia, USA                  | 777.7  | 420    | 33.54  |
| <i>Corallorhiza bentleyi</i>                       | 2550 WV*               | Monroe Co., West Virginia, USA            | 854.7  | 487.6  | 37.17  |
| <i>Corallorhiza bentleyi</i>                       | 257i VA                | Giles Co., Virginia, USA                  | 641.5  | 341.8  | 42.00  |
| <i>Corallorhiza bentleyi</i>                       | G18 VA                 | Giles Co., Virginia, USA                  | 641    | 134.1  | 39.21  |
| <i>Corallorhiza involuta</i>                       | 228aR MOR <sup>1</sup> | Cuernavaca, Morelos, Mexico               | 90.7   | 50.9   | 25.88  |
| <i>Corallorhiza involuta</i>                       | 228b MOR               | Cuernavaca, Morelos, Mexico               | 937.8  | 520.7  | 28.09  |
| <i>Corallorhiza involuta</i>                       | 237c MEX*              | Toluca, Mexico, Mexico                    | 2158.3 | 1273.5 | 42.80  |
| <i>Corallorhiza involuta</i>                       | 237cR MEX              | Toluca, Mexico, Mexico                    | 242    | 153.6  | 24.69  |
| <i>Corallorhiza involuta</i>                       | 237dR MEX              | Toluca, Mexico, Mexico                    | 347.8  | 215.4  | 21.78  |
| <i>Corallorhiza trifida</i>                        | 2767a MI               | Schoolcraft Co., Michigan, USA            | 2265.2 | 1144.4 | 51.55  |
| <i>Corallorhiza trifida</i>                        | 225c BC                | Thompson-Nicola, British Columbia, Canada | 873.9  | 447.1  | 47.61  |

C. Source citations and GenBank accession numbers for the four-gene dataset used in divergence time estimation.

|                                           | <i>matK</i>               | <b>ITS</b>                | <i>rbcL</i>             | <i>psaB</i>          |
|-------------------------------------------|---------------------------|---------------------------|-------------------------|----------------------|
| <i>Aa palacea</i>                         | Givnish et al., 2015      | FJ473308                  | Givnish et al., 2015    | Givnish et al., 2015 |
| <i>Angraecum sesquipedale</i>             | Givnish et al., 2015      | KX669265                  | Givnish et al., 2015    | Givnish et al., 2015 |
| <i>Aplectrum hyemale</i>                  | Freudenstein et al., 2017 | Freudenstein et al., 2017 | EU391356                | AY380935             |
| <i>Calopogon tuberosus</i>                | Givnish et al., 2015      | AF273395                  | AF074119                | Givnish et al., 2015 |
| <i>Calypso bulbosa</i>                    | This study                | Freudenstein et al., 2017 | Givnish et al., 2015    | Givnish et al., 2015 |
| <i>Catasetum integerrinum</i>             | Givnish et al., 2015      | C. saccatum<br>EU441204   | Givnish et al., 2015    | Givnish et al., 2015 |
| <i>Cattleya aurantiaca</i>                | Givnish et al., 2015      | KR149440                  | Givnish et al., 2015    | Givnish et al., 2015 |
| <i>Changnienia amoena</i>                 | Freudenstein et al., 2017 | Freudenstein et al., 2017 | KM873666                | n/a*                 |
| <i>Chloraea gavilu</i>                    | Givnish et al., 2015      | Freudenstein et al., 2017 | FR831981                | Givnish et al., 2015 |
| <i>Chysis bractescens</i>                 | Givnish et al., 2015      | EF079363                  | AF074126                | Givnish et al., 2015 |
| <i>Codonorchis lessonii</i>               | Givnish et al., 2015      | AF348005                  | Givnish et al., 2015    | Givnish et al., 2015 |
| <i>Coelia triptera</i>                    | Freudenstein et al., 2017 | Freudenstein et al., 2017 | Givnish et al., 2015    | Givnish et al., 2015 |
| <i>Coelogyne flaccida</i>                 | Givnish et al., 2015      | AF029855                  | Givnish et al., 2015    | Givnish et al., 2015 |
| <i>Corallorhiza bentleyi</i>              | This study                | Freudenstein et al., 2017 | This study              | This study           |
| <i>Corallorhiza bulbosa</i>               | Barrett et al., 2014      | Freudenstein et al., 2017 | Barrett et al., 2014    | Barrett et al., 2014 |
| <i>Corallorhiza involuta</i>              | This study                | Freudenstein et al., 2017 | This study              | This study           |
| <i>Corallorhiza macrantha</i>             | Barrett et al., 2014      | Freudenstein et al., 2017 | Barrett et al., 2014    | Barrett et al., 2014 |
| <i>Corallorhiza maculata maculata</i>     | Barrett et al., 2014      | Freudenstein et al., 2017 | Barrett et al., 2014    | Barrett et al., 2014 |
| <i>Corallorhiza maculata mexicana</i>     | Barrett et al., 2014      | Freudenstein et al., 2017 | Barrett et al., 2014    | Barrett et al., 2014 |
| <i>Corallorhiza maculata occidentalis</i> | Barrett et al., 2014      | Freudenstein et al., 2017 | Barrett et al., 2014    | Barrett et al., 2014 |
| <i>Corallorhiza mertensiana</i>           | Barrett et al., 2014      | Freudenstein et al., 2017 | Barrett et al., 2014    | Barrett et al., 2014 |
| <i>Corallorhiza odontorhiza</i>           | Barrett et al., 2014      | Freudenstein et al., 2017 | Barrett et al., 2014    | Barrett et al., 2014 |
| <i>Corallorhiza striata CA</i>            | This study                | JF319707                  | This study              | This study           |
| <i>Corallorhiza striata striata</i>       | This study                | Freudenstein et al., 2017 | This study              | This study           |
| <i>Corallorhiza striata vreelandii</i>    | Barrett and Davis, 2012   | Freudenstein et al., 2017 | Barrett and Davis, 2012 | This study           |

|                                |                           |                             |                      |                      |
|--------------------------------|---------------------------|-----------------------------|----------------------|----------------------|
| <i>Corallorhiza trifida</i>    | Barrett et al., 2014      | Freudenstein et al., 2017   | Barrett et al., 2014 | Barrett et al., 2014 |
| <i>Corallorhiza wisteriana</i> | Barrett et al., 2014      | Freudenstein et al., 2017   | Barrett et al., 2014 | Barrett et al., 2014 |
| <i>Coryanthes macrantha</i>    | Givnish et al., 2015      | AF239359                    | Givnish et al., 2015 | Givnish et al., 2015 |
| <i>Corycium carnosum</i>       | Givnish et al., 2015      | AJ000123                    | Givnish et al., 2015 | Givnish et al., 2015 |
| <i>Cremastra appendiculata</i> | Freudenstein et al., 2017 | Freudenstein et al., 2017   | EU391354             | n/a                  |
| <i>Cymbidium lancifolium</i>   | Givnish et al., 2015      | AF470520                    | Givnish et al., 2015 | Givnish et al., 2015 |
| <i>Cyrtopodium paranaense</i>  | Givnish et al., 2015      | C. saintlegerianum KY988620 | Givnish et al., 2015 | Givnish et al., 2015 |
| <i>Dactylostaix ringens</i>    | Freudenstein et al., 2017 | Freudenstein et al., 2017   | KM526772             | KM526760             |
| <i>Danxiaorchis singchiana</i> | Freudenstein et al., 2017 | Freudenstein et al., 2017   | JX293187             | n/a                  |
| <i>Dendrobium heterocarpum</i> | Givnish et al., 2015      | JN388593                    | Givnish et al., 2015 | Givnish et al., 2015 |
| <i>Earina autumnalis</i>       | Givnish et al., 2015      | AF260149                    | Givnish et al., 2015 | Givnish et al., 2015 |
| <i>Eria rosea</i>              | Givnish et al., 2015      | E. corneri KM025158         | Givnish et al., 2015 | Givnish et al., 2015 |
| <i>Eulophia petersii</i>       | Givnish et al., 2015      | KF318906                    | Givnish et al., 2015 | Givnish et al., 2015 |
| <i>Govenia superba</i>         | Freudenstein et al., 2017 | Freudenstein et al., 2017   | AF074175             | AY381017             |
| <i>Iris tenax</i>              | JQ276413                  | AF488761                    | JQ273918             | JQ276168             |
| <i>Liparis loeselii</i>        | Givnish et al., 2015      | EF079387                    | Givnish et al., 2015 | Givnish et al., 2015 |
| <i>Listera cordata</i>         | Givnish et al., 2015      | KJ023678                    | Givnish et al., 2015 | Givnish et al., 2015 |
| <i>Masdevalia coccinea</i>     | Givnish et al., 2015      | AF262789                    | Givnish et al., 2015 | Givnish et al., 2015 |
| <i>Maxillaria variabilis</i>   | Givnish et al., 2015      | KP323349                    | Givnish et al., 2015 | Givnish et al., 2015 |
| <i>Oreorchis patens</i>        | Freudenstein et al., 2017 | Freudenstein et al., 2017   | EU391355             | n/a                  |
| <i>Phaius tankervilleae</i>    | Givnish et al., 2015      | KM025161                    | Givnish et al., 2015 | Givnish et al., 2015 |
| <i>Pogonia ophioglossoides</i> | Givnish et al., 2015      | EU498161                    | Givnish et al., 2015 | Givnish et al., 2015 |
| <i>Thelymitra cyanea</i>       | Givnish et al., 2015      | AF348068                    | Givnish et al., 2015 | Givnish et al., 2015 |
| <i>Tipularia discolor</i>      | Freudenstein et al., 2017 | Freudenstein et al., 2017   | AF074234             | AY381084             |
| <i>Triphora trianthophora</i>  | Givnish et al., 2015      | KM598428                    | Givnish et al., 2015 | Givnish et al., 2015 |
| <i>Tropidia polystachya</i>    | Givnish et al., 2015      | EU490674                    | Givnish et al., 2015 | Givnish et al., 2015 |
| <i>Vanilla planifolia</i>      | Givnish et al., 2015      | AF391786                    | Givnish et al., 2015 | Givnish et al., 2015 |

|                            |                           |                           |                      |                      |
|----------------------------|---------------------------|---------------------------|----------------------|----------------------|
| <i>Yunorchis</i>           | Freudenstein et al., 2017 | Freudenstein et al., 2017 | KM526774             | n/a                  |
| <i>Zygopetalum mackayi</i> | Givnish et al., 2015      | AF239322                  | Givnish et al., 2015 | Givnish et al., 2015 |

\*n/a = not available.

#### D. Fossils used to calibrate divergence time estimates.

| Species                         | subfamily      | Tribe        | Age range of fossil | Minimum age, place in tree               | Citation                   |
|---------------------------------|----------------|--------------|---------------------|------------------------------------------|----------------------------|
| <i>Succinantha baltica</i>      | Epidendroideae | n/a          | 40-55 my            | 40 my for stem node of Epidendroideae    | Poinar and Rasmussen, 2017 |
| <i>Dendrobium winikaphyllum</i> | Epidendroideae | Dendrobiinae | 20-23 my            | 20 my for stem node of <i>Dendrobium</i> | Conran et al., 2009        |



E. Numbers of polymorphic sites and nucleotide diversity ( $\pi$ ) within each taxon of the *C. striata* complex (top), average number of differences between each taxon (middle), and result of Mantel correlation text (bottom).

| Taxon (# individuals)                         | # polymorphic sites | nucleotide diversity ( $\pi$ ) |
|-----------------------------------------------|---------------------|--------------------------------|
| <i>C. striata</i> var. <i>striata</i> (18)    | 364                 | 0.00063                        |
| <i>C. striata</i> var. <i>vreelandii</i> (11) | 192                 | 0.00039                        |
| <i>C. striata</i> Sierra Nevada (7)           | 127                 | 0.00048                        |
| <i>C. bentleyi</i> (5)                        | 2                   | 0.00001                        |
| <i>C. involuta</i> (3)                        | 17                  | 0.00012                        |

|                                          |        |        |        |      |
|------------------------------------------|--------|--------|--------|------|
| <i>C. striata</i> var. <i>striata</i>    |        |        |        |      |
| <i>C. striata</i> var. <i>vreelandii</i> | 222.5  |        |        |      |
| <i>C. striata</i> Sierra Nevada          | 620.8  | 556    |        |      |
| <i>C. bentleyi</i>                       | 2237.9 | 2110.8 | 2292.6 |      |
| <i>C. involuta</i>                       | 2251.7 | 2127.8 | 2405.0 | 24.2 |

|        |          |          |
|--------|----------|----------|
| Mantel | R = 0.54 | p = 0.01 |
|--------|----------|----------|

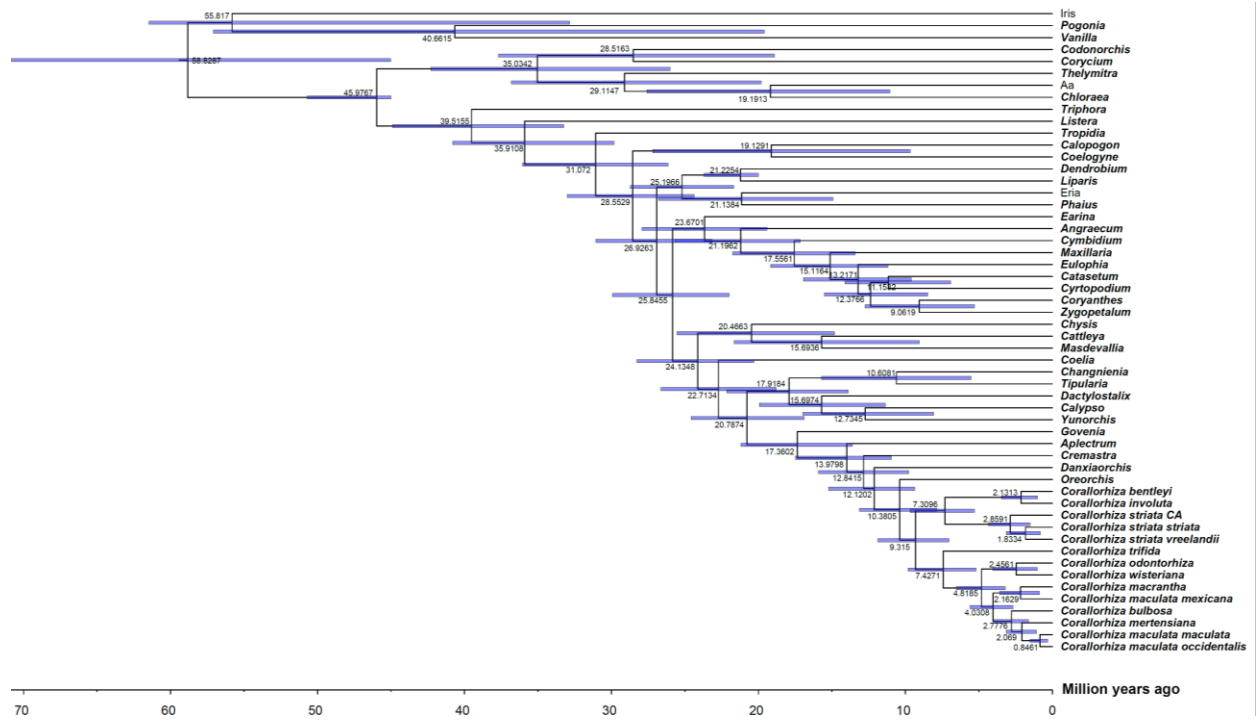

**F.** Divergence time estimates and 95% HPD for the four-gene orchid dataset, focusing on Calypsoinae and *Corallorhiza*, based on four genes and fossil calibrations described above in **D**.

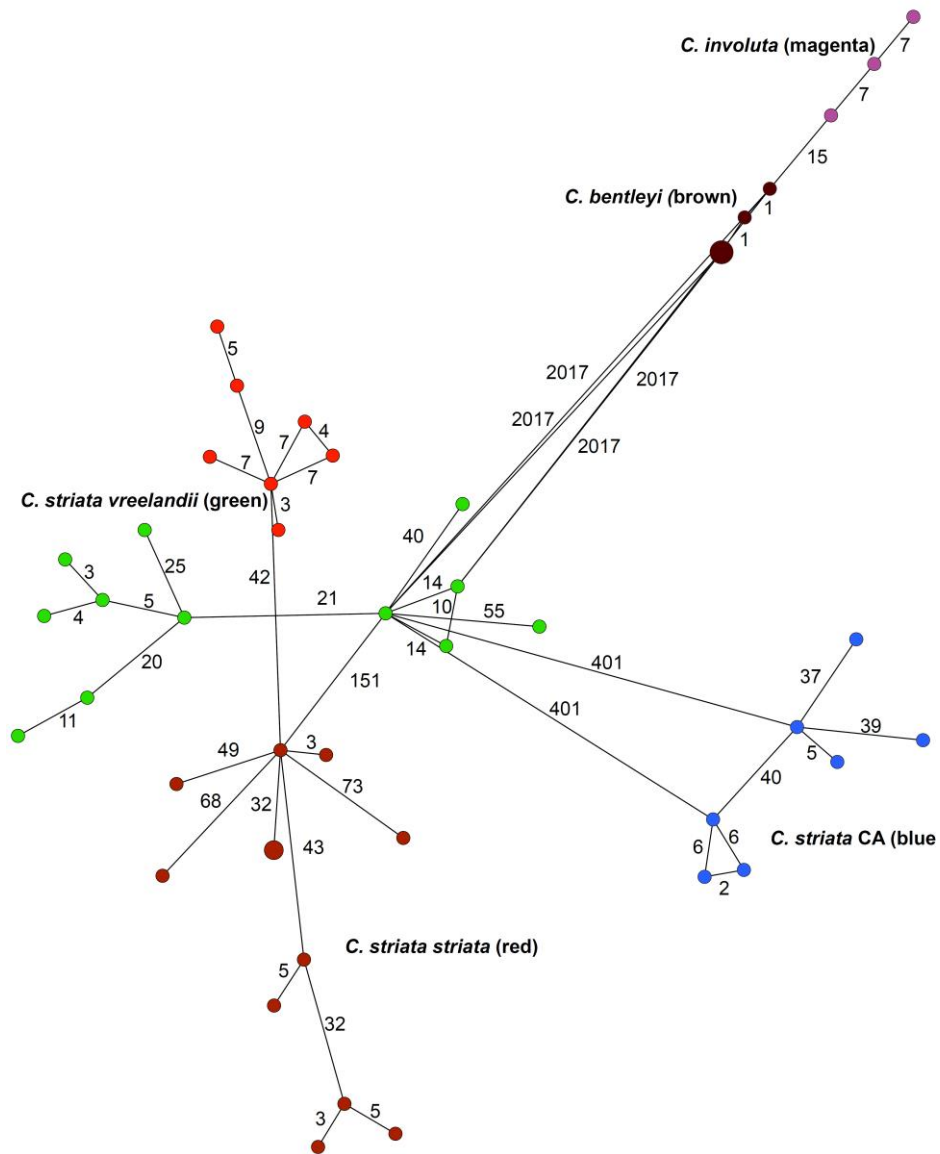

**G.** Minimum spanning haplotype network among plastomes of the *C. striata* complex, constructed in PopART. Numbering along network edges represents the numbers of mutations between haplotypes.

## References

- Bandelt H, Forster P, Röhl, A. 1999.** Median-joining networks for inferring intraspecific phylogenies. *Molecular Biology and Evolution* **16**: 37-48.
- Barrett CF, Freudenstein JV. 2009.** Patterns of morphological and plastid DNA variation in the *Corallorhiza striata* species complex (Orchidaceae). *Systematic Botany* **34**: 496-504.
- Barrett CF, Freudenstein JV. 2011.** An integrative approach to delimiting species in a rare but widespread mycoheterotrophic orchid. *Molecular Ecology* **20**: 2771-2786.
- Barrett CF, Davis JI. 2012.** The plastid genome of the mycoheterotrophic *Corallorhiza striata* (Orchidaceae) is in the relatively early stages of degradation. *American Journal of Botany* **99**: 1513-1523.
- Barrett CF, Freudenstein JV, Taylor DL, Kõljalg U. 2010.** Rangewide analysis of fungal associations in the fully mycoheterotrophic *Corallorhiza striata* complex (Orchidaceae) reveals extreme specificity on ectomycorrhizal *Tomentella* (Thelephoraceae) across North America. *American Journal of Botany* **97**: 628-643.
- Barrett CF, Freudenstein JV, Li J, Mayfield-Jones DR, Perez L, Pires JC, Santos C. 2014.** Investigating the path of plastid genome degradation in an early-transitional clade of heterotrophic orchids, and implications for heterotrophic angiosperms. *Molecular Biology and Evolution* **31**: 3095-3112.
- Bouckaert R, Heled J, Kühnert D, Vaughan T, Wu C-H, Xie D, Suchard MA, Rambaut A, Drummond AJ. 2014.** BEAST 2: A Software Platform for Bayesian Evolutionary Analysis. *PLoS Computational Biology* **10**: e1003537.
- Cameron KM. 2004.** Utility of plastid *psaB* gene sequences for investigating intrafamilial relationships within Orchidaceae. *Molecular Phylogenetics and Evolution*. **31**: 1157-1180.
- Conran JG, Bannister JM, Lee DE. 2009.** Earliest Orchid Macrofossils: Early Miocene *Dendrobium* and *Earina* (Orchidaceae: Epidendroideae) from New Zealand. *American Journal of Botany* **96**: 466-474.
- Drummond AJ, Ho SYW, Phillips MJ, Rambaut A. 2006.** Relaxed phylogenetics and dating with confidence. *PLoS Biology* **4**: e88.
- Freudenstein JV, Yukawa T, Luo YB. 2017.** A reanalysis of relationships among Calypsoinae (Orchidaceae: Epidendroideae): floral and vegetative evolution and the placement of *Yoania*. *Systematic Botany* **42**: 17-25.
- Freudenstein JV, Senyo DM. 2008.** Relationships and evolution of *matK* in a group of leafless orchids (*Corallorhiza* and *Corallorhizinae*; Orchidaceae: Epidendroideae). *American Journal of Botany* **95**: 498-505.
- Givnish TJ, Spalink D, Ames M, Lyon SP, Hunter SJ, Zuluaga A, Iles WJ, Clements MA, Arroyo MT, Leebens-Mack J, et al. 2015.** Orchid phylogenomics and multiple drivers of their extraordinary diversification. *Proceeding of the Royal Society B*. **282**. 20151553. <http://dx.doi.org/10.1098/rspb.2015.1553>.
- Iles WJD, Smith SY, Gandolfo MA, Graham SW. 2015.** Monocot fossils suitable for molecular dating analyses. *Botanical Journal of the Linnean Society* **178**: 346-374.
- Kumar S, Stecher G, Tamura K. 2016.** MEGA7: Molecular Evolutionary Genetics Analysis version 7.0. *Molecular Biology and Evolution* **33**: 1870-1874.
- Leigh JW, Bryant D. 2015.** PopART: full-feature software for haplotype network construction. *Methods in Ecology and Evolution*, **6**: 1110–1116.

**Peakall R, Smouse PE. 2012.** GenAlEx 6.5: genetic analysis in Excel. Population genetic software for teaching and research-an update. *Bioinformatics* **28**: 2537-2539.

**Poinar G, Rasmussen FN. 2017.** Orchids from the past, with a new species in Baltic amber. *Botanical Journal of the Linnean Society* **183**: 327-333.
